# Supplementary material for: Rapid disappearance of influenza following the implementation of COVID-19 mitigation measures in Hamilton, Ontario
Source: bioRxiv or medRxiv preprint supplement (doi:10.1101/2020.11.27.20240036), 2020-12-24
Supplement: Supplementary file [file media-1.pdf]

## Appendix

# Rapid disappearance of influenza following the implementation of COVID-19 mitigation measures in Hamilton, Ontario

Kevin Zhang,<sup>1,\*</sup> Avika Misra,<sup>2</sup> Patrick J. Kim,<sup>3</sup> Seyed M. Moghadas,<sup>4</sup> Joanne M. Langley,<sup>5</sup> Marek Smieja<sup>3,6</sup>

<sup>1</sup> Faculty of Medicine, University of Toronto, Toronto, Ontario, Canada, M5S 1A8

<sup>2</sup> Faculty of Medicine, University of Ottawa, Ottawa, Ontario, Canada, K1H 8M5

<sup>3</sup> Department of Medicine, McMaster University, Hamilton, Ontario, Canada, L8S 4L8

<sup>4</sup> Agent-Based Modelling Laboratory, York University, Toronto, Ontario, Canada, M3J 1P3

<sup>5</sup> Canadian Center for Vaccinology, Dalhousie University, IWK Health Centre and Nova Scotia Health Authority, Halifax, Nova Scotia, Canada, B3K 6R8

<sup>6</sup> St. Joseph's Healthcare Hamilton, Hamilton, Ontario, Canada, L8N 4A6

\*Corresponding author: [kevink.zhang@mail.utoronto.ca](mailto:kevink.zhang@mail.utoronto.ca)

**Table A1.** Percent positivity of laboratory-confirmed influenza in Hamilton, Ontario in weeks 1-26 of 2010-2019.

| Week | Mean | Median | Quartile 1 | Quartile 3 | Standard Deviation |
|------|------|--------|------------|------------|--------------------|
| 1    | 18.5 | 21.1   | 11.0       | 26.2       | 10.3               |
| 2    | 16.0 | 15.6   | 3.6        | 29.8       | 11.2               |
| 3    | 17.4 | 21.0   | 5.4        | 26.1       | 10.0               |
| 4    | 16.5 | 12.2   | 5.8        | 26.6       | 11.9               |
| 5    | 16.8 | 17.3   | 8.8        | 24.9       | 10.3               |
| 6    | 17.5 | 16.7   | 12.7       | 23.8       | 9.2                |
| 7    | 15.2 | 16.0   | 7.4        | 21.5       | 8.8                |
| 8    | 15.9 | 15.2   | 6.8        | 23.8       | 9.3                |
| 9    | 14.6 | 13.9   | 8.2        | 20.7       | 9.1                |
| 10   | 14.8 | 14.2   | 5.8        | 20.0       | 10.1               |
| 11   | 12.7 | 11.2   | 3.9        | 21.6       | 8.5                |

|    |      |      |     |      |     |
|----|------|------|-----|------|-----|
| 12 | 10.2 | 10.9 | 5.1 | 16.0 | 6.2 |
| 13 | 11.4 | 10.9 | 5.6 | 18.4 | 6.8 |
| 14 | 11.5 | 9.8  | 3.6 | 20.3 | 8.4 |
| 15 | 8.5  | 7.6  | 4.1 | 11.7 | 5.8 |
| 16 | 7.4  | 5.4  | 2.5 | 13.1 | 5.9 |
| 17 | 7.3  | 5.8  | 2.2 | 11.9 | 5.6 |
| 18 | 5.5  | 6.3  | 2.2 | 7.1  | 3.4 |
| 19 | 3.2  | 2.0  | 0.9 | 5.8  | 3.2 |
| 20 | 3.3  | 1.6  | 0.7 | 6.3  | 3.3 |
| 21 | 1.9  | 0.7  | 0.0 | 2.4  | 3.0 |
| 22 | 1.4  | 0.7  | 0.0 | 3.0  | 1.5 |
| 23 | 1.2  | 0.0  | 0.0 | 2.1  | 1.9 |
| 24 | 0.8  | 0.0  | 0.0 | 1.9  | 1.1 |
| 25 | 0.3  | 0.0  | 0.0 | 0.3  | 0.6 |
| 26 | 0.0  | 0.0  | 0.0 | 0.0  | 0.0 |

**Table A2.** Percent positivity of laboratory-confirmed influenza, respiratory syncytial virus, metapneumovirus, parainfluenza, adenovirus, and rhinovirus/enterovirus in Hamilton, Ontario in weeks 1-26 of 2020.

| Week | Influenza Percent Positivity | Respiratory Syncytial Virus Percent Positivity | Metapneumovirus Percent Positivity | Parainfluenza Percent Positivity | Adenovirus Percent Positivity | Rhinovirus/Enterovirus Percent Positivity |
|------|------------------------------|------------------------------------------------|------------------------------------|----------------------------------|-------------------------------|-------------------------------------------|
| 1    | 17.7                         | 5.9                                            | 0.5                                | 0.0                              | 0.5                           | 2.2                                       |
| 2    | 9.6                          | 5.6                                            | 0.8                                | 0.4                              | 0.8                           | 1.6                                       |
| 3    | 9.6                          | 1.8                                            | 0.9                                | 0.4                              | 0.4                           | 3.9                                       |
| 4    | 11.5                         | 5.8                                            | 0.8                                | 0.0                              | 0.4                           | 1.2                                       |
| 5    | 6.2                          | 4.5                                            | 0.7                                | 0.0                              | 0.3                           | 2.4                                       |
| 6    | 10.4                         | 2.3                                            | 1.2                                | 0.4                              | 0.8                           | 1.5                                       |
| 7    | 5.8                          | 1.9                                            | 1.0                                | 0.0                              | 1.0                           | 1.4                                       |
| 8    | 8.8                          | 2.4                                            | 2.4                                | 0.0                              | 0.0                           | 2.4                                       |
| 9    | 3.2                          | 0.5                                            | 0.5                                | 0.0                              | 0.5                           | 0.0                                       |
| 10   | 5.8                          | 1.5                                            | 1.9                                | 1.0                              | 1.0                           | 4.4                                       |

|    |     |     |     |     |     |     |
|----|-----|-----|-----|-----|-----|-----|
| 11 | 5.1 | 0.6 | 2.4 | 0.4 | 0.4 | 6.1 |
| 12 | 0.0 | 0.0 | 0.5 | 0.2 | 0.0 | 0.2 |
| 13 | 0.1 | 0.0 | 0.1 | 0.1 | 0.0 | 0.2 |
| 14 | 0.0 | 0.0 | 0.0 | 0.0 | 0.0 | 0.0 |
| 15 | 0.0 | 0.0 | 0.0 | 0.0 | 0.0 | 0.0 |
| 16 | 0.0 | 0.0 | 0.0 | 0.0 | 0.0 | 0.0 |
| 17 | 0.0 | 0.0 | 0.0 | 0.0 | 0.0 | 0.0 |
| 18 | 0.0 | 0.0 | 0.0 | 0.0 | 0.0 | 0.0 |
| 19 | 0.0 | 0.0 | 0.0 | 0.0 | 0.0 | 0.0 |
| 20 | 0.0 | 0.0 | 0.0 | 0.0 | 0.0 | 0.0 |
| 21 | 0.0 | 0.0 | 0.0 | 0.0 | 0.0 | 0.0 |
| 22 | 0.0 | 0.0 | 0.0 | 0.0 | 0.0 | 0.0 |
| 23 | 0.0 | 0.0 | 0.0 | 0.0 | 0.0 | 0.0 |
| 24 | 0.0 | 0.0 | 0.0 | 0.0 | 0.0 | 0.0 |
| 25 | 0.0 | 0.0 | 0.0 | 0.0 | 0.0 | 0.0 |
| 26 | 0.0 | 0.0 | 0.0 | 0.0 | 0.0 | 0.0 |

**Table A3.** Estimated model parameters from Bayesian inference.

| Parameter | Mean   | 95% CrI        |
|-----------|--------|----------------|
| $\beta_1$ | 13.494 | -0.891, 21.695 |
| $\beta_2$ | 0.114  | -0.888, 1.985  |
| $\sigma$  | 4.005  | 1.932, 5.102   |
